# Supplementary material
Source: MDPI journal article supplement (https://www.mdpi.com/2077-1312/11/10/2004)
Supplement: s1 [file s1]

Archive with 1 entries (1 files):
- jmse-2640827-supplementary.pdf
